# Supplementary material for: Teaching Reading Skills to a First-Grade Student with Mild Intellectual Disability: A Single-Subject Intervention Study
Source: Research Square preprint supplement (doi:10.21203/rs.3.rs-8845136/v1), 2026-02-19
Supplement: Supplementary file 1 [file e4dc7fd28fc5a573e8b2810e.docx]

**Supplementary Material (Appendix A)**

**Criterion-Referenced Assessment Tools Set**

This criterion-referenced assessment tools set was developed to evaluate first-grade Turkish literacy skills, including **letter recognition, syllable reading, word reading, and sentence reading** within the scope of primary school Turkish reading and writing instruction.

The assessment tools were structured in accordance with the **phonics-based sentence method** and organized in a sequential and hierarchical manner aligned with the instructional process. These tools are suitable for monitoring performance levels in **single-subject research designs** and for evaluating objectives in **Individualized Education Programs (IEP)**.

**Mastery Criteria**

Based on the criterion-referenced assessment approach, minimum mastery percentages were defined for each instructional level:

- **Letter Recognition (D1):** 80%
- **Syllable Reading (D1 → D2):** 80%
- **Word Reading (D2):** 85%
- **Sentence Reading (D3):** 80%

Meeting the specified criteria was interpreted as the student having acquired the targeted skill at the corresponding instructional stage.

**1. Letter Recognition Recording Forms (D1)**

In this form, letters presented during instruction were shown individually to the student. Student responses were coded as correct (1) or incorrect (0). Total scores and percentage of accuracy were calculated for each letter group.

**Student Name:** ____________________
**Date:** //202…

| **Letter Group** | **Presented Letters** | **Correct (1)** | **Incorrect (0)** | **Score / Percentage** |
| --- | --- | --- | --- | --- |
| Group 1 | A, N, E, T, İ, L | [ ] | [ ] | ___ / 6 (%___) |
| Group 2 | O, K, U, R, I, M | [ ] | [ ] | ___ / 6 (%___) |
| Group 3 | Ü, S, Ö, Y, D, Z | [ ] | [ ] | ___ / 6 (%___) |
| Group 4 | Ç, B, G, C, Ş | [ ] | [ ] | ___ / 5 (%___) |
| Group 5 | P, H, V, Ğ, F, J | [ ] | [ ] | ___ / 6 (%___) |

**2. Syllable Reading Recording Forms (D1 → D2)**

These forms were designed to evaluate students’ ability to blend learned letters into syllables. Each correctly read syllable or word was scored as 1 point, and each incorrect response as 0 points.

**2.1 Group 1 (A–N–E–T–İ–L)**

| **Syllable** | **C (1)** | **I (0)** | **Syllable** | **C (1)** | **I (0)** |
| --- | --- | --- | --- | --- | --- |
| la | [ ] | [ ] | al | [ ] | [ ] |
| na | [ ] | [ ] | an | [ ] | [ ] |
| ta | [ ] | [ ] | at | [ ] | [ ] |
| ne | [ ] | [ ] | el | [ ] | [ ] |
| li | [ ] | [ ] | il | [ ] | [ ] |

**Total Score:** ___ / 10  **Criterion:** 80%

**2.2 Group 2 (O–K–U–R–I–M)**

| **Syllable** | **C (1)** | **I (0)** | **Syllable** | **C (1)** | **I (0)** |
| --- | --- | --- | --- | --- | --- |
| ko | [ ] | [ ] | ok | [ ] | [ ] |
| ku | [ ] | [ ] | ur | [ ] | [ ] |
| ro | [ ] | [ ] | om | [ ] | [ ] |
| ru | [ ] | [ ] | ir | [ ] | [ ] |
| mu | [ ] | [ ] | ak | [ ] | [ ] |

**Total Score:** ___ / 10  **Criterion:** 80%

**2.3 Group 3 (Ü–S–Ö–Y–D–Z)**

| **Syllable** | **C (1)** | **I (0)** | **Syllable** | **C (1)** | **I (0)** |
| --- | --- | --- | --- | --- | --- |
| sü | [ ] | [ ] | söz | [ ] | [ ] |
| sö | [ ] | [ ] | düz | [ ] | [ ] |
| dü | [ ] | [ ] | öz | [ ] | [ ] |
| yaz | [ ] | [ ] | yüz | [ ] | [ ] |
| yüz | [ ] | [ ] | diz | [ ] | [ ] |

**Total Score:** ___ / 10  **Criterion:** 80%

**2.4 Group 4 (Ç–B–G–C–Ş)**

| **Syllable** | **C (1)** | **I (0)** | **Syllable** | **C (1)** | **I (0)** |
| --- | --- | --- | --- | --- | --- |
| ça | [ ] | [ ] | aç | [ ] | [ ] |
| ba | [ ] | [ ] | saç | [ ] | [ ] |
| ga | [ ] | [ ] | geç | [ ] | [ ] |
| ce | [ ] | [ ] | çaba | [ ] | [ ] |
| şa | [ ] | [ ] | baş | [ ] | [ ] |

**Total Score:** ___ / 10  **Criterion:** 80%

**2.5 Group 5 (P–H–V–Ğ–F–J)**

| **Syllable** | **C (1)** | **I (0)** | **Syllable** | **C (1)** | **I (0)** |
| --- | --- | --- | --- | --- | --- |
| pa | [ ] | [ ] | fi | [ ] | [ ] |
| ha | [ ] | [ ] | haf | [ ] | [ ] |
| va | [ ] | [ ] | yap | [ ] | [ ] |
| fa | [ ] | [ ] | pil | [ ] | [ ] |
| pi | [ ] | [ ] | var | [ ] | [ ] |

**Total Score:** ___ / 10  **Criterion:** 80%

**3. Word Reading Recording Form (D2)**

| **Word** | **C (1)** | **I (0)** | **Word** | **C (1)** | **I (0)** |
| --- | --- | --- | --- | --- | --- |
| anne | [ ] | [ ] | araba | [ ] | [ ] |
| okul | [ ] | [ ] | kitap | [ ] | [ ] |
| masa | [ ] | [ ] | balık | [ ] | [ ] |
| kalem | [ ] | [ ] | çanta | [ ] | [ ] |
| çocuk | [ ] | [ ] | evler | [ ] | [ ] |

**Total Score:** ___ / 10  **Criterion:** 85%

**4. Sentence Reading Recording Form (D3)**

| **Sentence** | **2 Points** | **1 Point** | **0 Points** |
| --- | --- | --- | --- |
| Ali top at. | [ ] | [ ] | [ ] |
| Anne elma al. | [ ] | [ ] | [ ] |
| Ece okula git. | [ ] | [ ] | [ ] |
| Baba araba sür. | [ ] | [ ] | [ ] |
| Çocuk kitap oku. | [ ] | [ ] | [ ] |

**Total Score:** ___ / 10  **Criterion:** 80%
